# Supplementary material for: Diel changes and diversity of pufM expression in freshwater communities of anoxygenic phototrophic bacteria
Source: PubMed Central journal article supplement (PMC6904477; doi:10.1038/s41598-019-55210-x), 2019-12-10
Supplement: 41598_2019_55210_MOESM2_ESM.pdf [file 41598_2019_55210_MOESM2_ESM.pdf]

1

2

SUPPLEMENTARY FILE

3

4

5 **Diel changes and diversity of *pufM* expression in freshwater communities of**  
6 **anoxygenic phototrophic bacteria**

7

8 Lívía Kolesár Fecskeová<sup>1</sup>, Kasia Piwosz<sup>1</sup>, Martina Hanusová<sup>1</sup>, Jiří Nedoma<sup>2</sup>, Petr Znachor<sup>2</sup>,  
9 Michal Koblížek<sup>1</sup>

10

11 <sup>1</sup>Lab. of Anoxygenic Phototrophs, Centre Algatech, Institute of Microbiology of the Czech  
12 Academy of Sciences, 37981 Třeboň, Czech Republic

13 <sup>2</sup>Biology Centre of the Czech Academy of Sciences, Institute of Hydrobiology

14 Na Sádkách 702/7, 370 05 České Budějovice, Czech Republic.

15

16

17

## 18 **Supplementary methods**

### 19 ***Phytoplankton community composition***

20 A submersible fluorescence probe (FluoroProbe, bbe-Moldaence, Kiel, Germany) was used  
21 to measure chlorophyll *a* concentration in a detailed vertical profile at ~ 0.2 m intervals  
22 down to 20 m depth. According to the specific fluorescence spectra of distinct groups of  
23 phytoplankton, the probe permits differentiation of Cyanobacteria, Chromophytes +  
24 Dinoflagellates (a mixed group with diatoms being frequently the most important),  
25 Cryptophytes and Chlorophytes in mixed natural populations (56). The fluorescence probe  
26 was provided with original software (FluoroProbe 1.8.4, bbe Moldaence), which allowed  
27 the quantification of each phytoplankton group expressed in terms of the equivalent amount  
28 of chlorophyll *a* per liter of water.

29

### 30 ***Nucleic acid extraction***

31 Total nucleic acids (RNA and DNA) were isolated from the filters according to the protocol  
32 described in Nercessian *et al.* (58). Briefly, cut filters and 0.2 g of each 0.01 mm, 0.1 mm  
33 and 1 mm zirconia-silica beads (BioSpec Products, USA) were suspended in 750  $\mu$ l of  
34 extraction buffer (a mixture of equal volumes of 10% CTAB [cetyltrimethylammonium  
35 bromide] in 1.6 M NaCl and 0.2 M phosphate buffer, pH 8.0), to which 75  $\mu$ l each of 10%  
36 sodium dodecyl sulfate and 10% lauroyl sarcosine were added. After addition of 750  $\mu$ l of  
37 phenol-chloroform-isoamyl alcohol (25:24:1), the mixtures were homogenized in a  
38 minib eater (BioSpec Products, USA) for 3 min and then centrifuged at 16,000  $\times$  g for 5 min  
39 at 4°C. The aqueous phase was mixed with an equal volume of chloroform-isoamyl alcohol  
40 (24:1) and centrifuged at 16,000  $\times$  g for 5 min at 4°C. Nucleic acids were precipitated by  
41 adding 2 volumes of 30% PEG 6000 in 1.6 M NaCl for 2 h at 4°C. Nucleic acids were

42 recovered by centrifugation at  $16,000 \times g$  for 90 min at  $4^{\circ}\text{C}$ , washed with 75% ethanol, and  
43 resuspended in 30  $\mu\text{l}$  of sterile nuclease-free water.

44

#### 45 ***Pigment analyses***

46 Pigments were extracted from homogenized filters (15 mL glass homogenizer and power-  
47 driven Teflon piston) in 8 mL of 7:2 v/v acetone:methanol mixture (35). Clear extracts were  
48 analyzed using a Prominence-i HPLC system (Shimadzu Inc., Japan) equipped with a UV-  
49 VIS diode-array detector. Pigments were separated using a heated ( $40^{\circ}\text{C}$ ) Phenomenex Luna  
50  $3\mu\text{C8}(2)$  100  $\text{\AA}$  column with binary solvent system A: 20% 28 mM ammonium acetate +  
51 80% methanol, B: 100% methanol, with flow rate of  $0.8 \text{ mL min}^{-1}$ . The peak for BChl *a* was  
52 registered at 770 nm and the pigment concentration in the original sample was calculated  
53 from the peak area. The HPLC system was calibrated using 100% methanol extracts of  
54 *Synechocystis* sp. PCC6803 and *Rhodobacter sphaeroides* with known concentrations of Chl  
55 *a* or BChl *a*, respectively.

#### 56 ***Thymidine uptake by microbial community***

57 Bacterial activity during the experiment at Cep lake was measured in samples collected at  
58 6:00 and 18:00 of astronomical time. One liter of water was collected into a clean glass  
59 bottle and transported to the laboratory in cold box within 30 min. The assimilation rate of  
60  $^3\text{H}$ -thymidine (American Radiolabeled Chemicals, St. Luis, MO, USA) was measured in  
61 triplicate following the protocol by Kirchman *et al.* (ref. S1). 10 mL of water were aliquoted  
62 into 20 mL HDPE scintillation vials (Thermo Fisher Scientific, Waltham, MA, USA), and  
63 radiolabeled compounds were added to a final concentration of  $20 \text{ nmol L}^{-1}$ . Samples killed  
64 using trichloroacetic acid (TCA, final conc. 1%) served as negative controls. The vials were  
65 incubated at *in situ* temperature in the dark. The incubations were terminated after 1 h using  
66 TCA. The samples were filtered onto nitrate cellulose filters (pore size  $0.2 \mu\text{m}$ , diameter 25

67 mm, Pragopor, Prague, Czechia), washed twice with 2.5 mL of ice-cold 5% TCA (5%  
68 solution, w/v) and subsequently twice with 2.5 mL of ice-cold 80% ethanol solution (v/v).  
69 The filters were air-dried, and dissolved in 1 mL of ethyl acetate. 4 mL the Ultima Golt LLT  
70 scintillation cocktail (Parkin Elmer, Waltham, MA, USA) were added, and samples were  
71 left for 48 h in the dark. The radioactivity in the samples was measured using a Tri-Carb  
72 2810 TR scintillation counter (PerkinElmer Inc., Waltham, MA, USA).

73 Bacterial production during the experiment at the Římov Reservoir was also measured in  
74 samples collected at 6:00 and 18:00 of astronomical time as described in Straškrabová *et al.*  
75 (ref. S2). Subsamples (10 mL) of water sample were incubated with <sup>3</sup>H-thymidine (final  
76 concentration 20 nmol L<sup>-1</sup>) at *in situ* temperature for 30 min. Incubations were terminated  
77 by the addition of 2% formaldehyde (final concentration, the same was used for blanks),  
78 samples were then filtered through 0.2 µm polycarbonate filters and extracted directly on  
79 filters with 2 mL of ice-cold 5% TCA 5 times for 1 min. The cell production rate (cells L<sup>-1</sup>  
80 day<sup>-1</sup>) was calculated assuming the theoretical conversion factor of 2 × 10<sup>18</sup> cells per mol of  
81 thymidine.

82

### 83 ***Primary production***

84 Primary production (PP) and extracellular release (ER) were measured with the <sup>14</sup>C method  
85 as described in Straškrabová (ref. S2). Water samples (two light and two dark bottles,  
86 volume cca 120 mL<sup>-1</sup>) were incubated *in situ* at 0.5 m depth for 4 h. Each bottle received  
87 0.1–0.2 MBq of carrier-free <sup>14</sup>C-bicarbonate. From each bottle, 1 mL aliquot of incubated  
88 sample was transferred to a scintillation vial containing 20 µl of 5M NaOH (to prevent a  
89 loss of <sup>14</sup>C-bicarbonate), and a 40 mL aliquot was filtered through a 1 µm polycarbonate  
90 filter (Poretics, USA, diameter 47 mm). The resulting filtrate contained dissolved <sup>14</sup>C-DOC  
91 plus <sup>14</sup>C-DOC taken up by bacteria during incubation. Very low vacuum of <0.01 MPa (<3

92 in Hg) and a filter funnel with a large filtration area (10.2 cm<sup>2</sup>) were used to avoid cell  
93 breakage during filtration. Three parallel 10 mL portions of the filtrate were transferred to  
94 scintillation vials, acidified by adding 200 µL 5M HCl, and air-bubbled for 1 h to remove  
95 unassimilated inorganic <sup>14</sup>C. The total added, filter-retained and filtrate <sup>14</sup>C activities were  
96 measured after the addition of 10 mL of scintillation cocktail (Ultima Gold XR, Sigma-  
97 Aldrich, St Louis, USA) with scintillation spectrometry. Extracellular release (ER) was  
98 assumed to be equivalent to <sup>14</sup>C-DOC present in filtrate, primary production (PP) was  
99 calculated as the sum of filter-retained <sup>14</sup>C and ER. To get carbon fluxes (µgC L<sup>-1</sup> h<sup>-1</sup>), the  
100 rates (h<sup>-1</sup>) (calculated as a fraction of the added inorganic <sup>14</sup>C incorporated or released per  
101 hour) were corrected for dark-bottle values and incubation time, and multiplied by the  
102 concentration of dissolved inorganic carbon (DIC), calculated from pH and the alkalinity  
103 determined by Gran titration.

1 **Supplementary Table S1:** Summary of primers used in this study and PCR/qPCR conditions

| Primer        | Sequence (5'→ 3')          | Description                                                                       | Conditions*                       | Product length | Reference  |
|---------------|----------------------------|-----------------------------------------------------------------------------------|-----------------------------------|----------------|------------|
| <b>pufM F</b> | TACGGSAACTGTWCTAC          | <b>RT-qPCR</b><br>Universal primers for the reaction center subunit M             | Fw 1000 nM<br>Rev 500 nM<br>58°C, | 198 bp         | 20         |
| <b>pufM R</b> | CCATSGTCCAGCGCCAGAA        |                                                                                   |                                   |                |            |
| <b>rpoB F</b> | GARCARGAVGTBTAYATGGGBGA    | <b>RT-qPCR</b><br>Proteobacteria-specific RNA-polymerase sigma factor             | Both primers<br>1500 nM<br>58°C,  | 197 bp         | This study |
| <b>rpoB R</b> | CCANGARCCRCGRTVGGRAT       |                                                                                   |                                   |                |            |
| <b>pufM F</b> | GGNAAYTNTWYTAYAAAYCCNTTYCA | <b>Amplicon sequencing</b><br>Universal primers for the reaction center subunit M | Both primers<br>1500 nM<br>57°C,  | 191 bp         | 19         |
| <b>pufM R</b> | YCCATNGTCCANCKCCARAA       |                                                                                   |                                   |                |            |
| <b>16S F</b>  | CCTACGGGNGGCWGCAG          | <b>Amplicon sequencing</b><br>V3-V4 region of the bacterial 16S gene              | Both primers<br>500 nM<br>55°C,   | 460 bp         | 66         |
| <b>16S R</b>  | GACTACHVGGGTATCTAATCC      |                                                                                   |                                   |                |            |

2

3 \*Final primer concentration and annealing temperature

4

5

6 **Supplementary Table S2:** Alpha diversity indices of *pufM* libraries rarefied by random  
7 selection to 30 000 sequences, except for the Cep DNA library, which has total number of  
8 sequences 26 225.

|                                 | <i>Cep lake</i> |             |             | <i>Římov Reservoir</i> |            |
|---------------------------------|-----------------|-------------|-------------|------------------------|------------|
|                                 | <i>DNA</i>      | <i>RNA1</i> | <i>RNA2</i> | <i>DNA</i>             | <i>RNA</i> |
| <b><i>Total reads</i></b>       | 26 225          | 30 000      | 30 000      | 30 000                 | 30 000     |
| <b><i>Number of OTUs</i></b>    | 323             | 297         | 360         | 423                    | 325        |
| <b><i>Shannon-Wiener DI</i></b> | 3.42            | 3.32        | 3.35        | 3.83                   | 3.26       |
| <b><i>Simpson DI</i></b>        | 0.082           | 0.074       | 0.068       | 0.044                  | 0.093      |
| <b><i>RICHNESS Chao-1</i></b>   | 491             | 466         | 765         | 692                    | 548        |

9

10

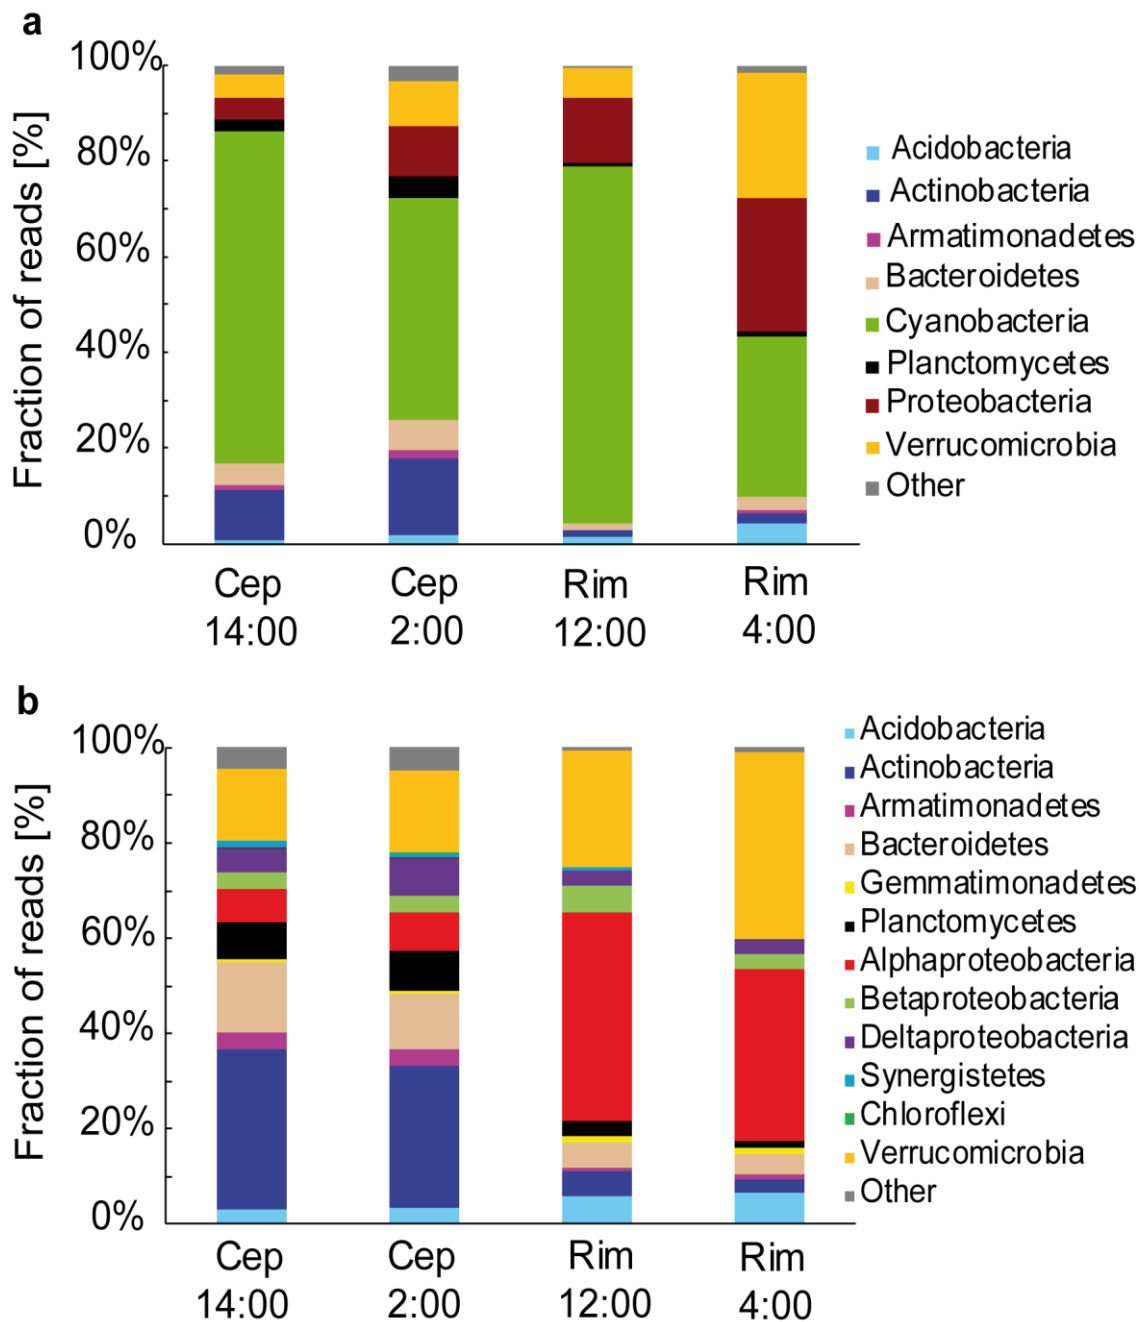

11

12 **Supplementary Figure S1.** Composition of total bacterial 16S rRNA transcript amplicon  
 13 libraries of Cep lake (Cep) and the Římov Reservoir (Rim) in day (14:00 in Cep, 12:00 in  
 14 Římov) and night (2:00 in Cep, 4:00 in Římov) samples. Relative abundance of the main  
 15 phyla (a) and relative abundance of all phyla and subdivisions of Proteobacteria after  
 16 subtraction of cyanobacterial reads (b).





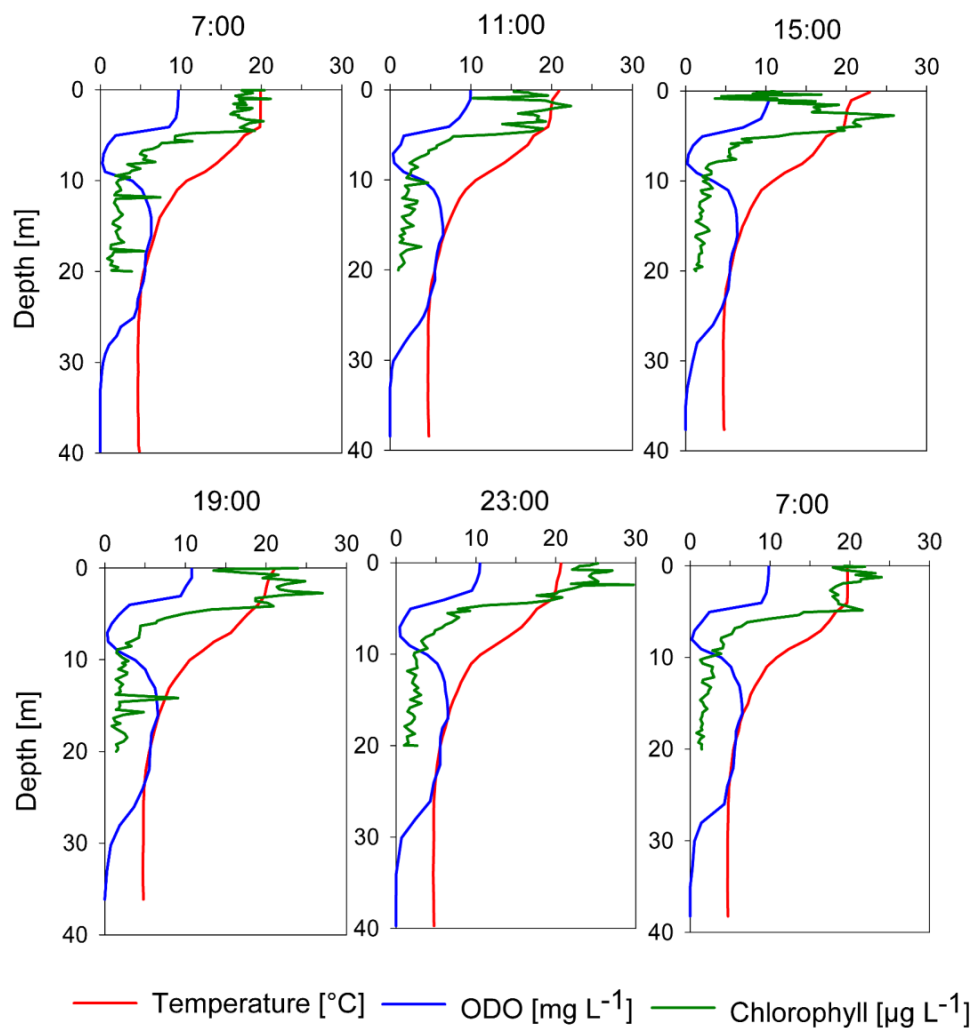

19

20

21 **Supplementary Figure S2.** Water vertical profiles of temperature, concentrations of  
 22 dissolved oxygen and chlorophyll in the Římov Reservoir on August 23–24, 2017, measured  
 23 at the dam in different times through one diel cycle.

24

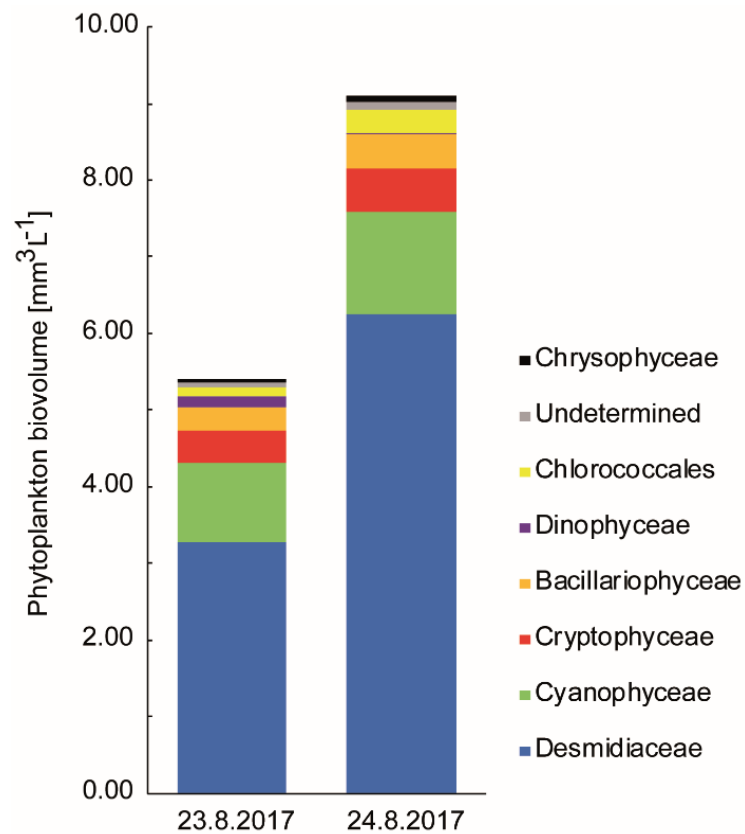

26

27

28 **Supplementary Figure S3.** Phytoplankton biovolume in the Římov Reservoir, determined in  
 29 the mesocosm during the time of the experiment. Total biovolume was  $5.41 \text{ mm}^3 \text{ L}^{-1}$  and  $9.11$   
 30  $\text{mm}^3 \text{ L}^{-1}$  on August 23<sup>rd</sup> and 24<sup>th</sup>, 2017, respectively.

31

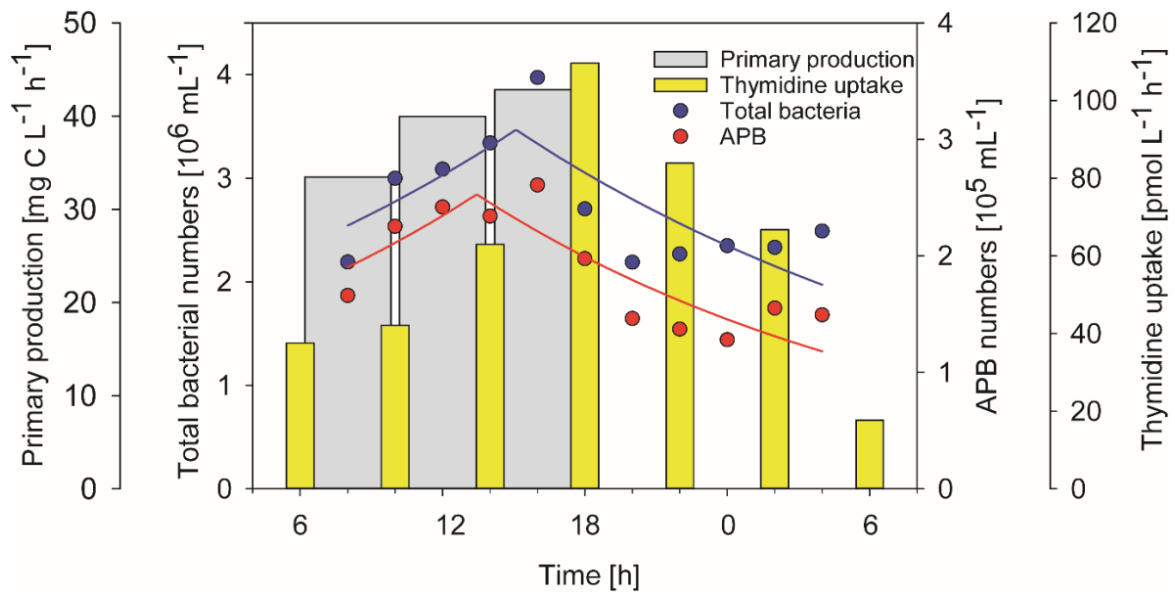

32

33 **Supplementary Figure S4.** Total and APB bacterial numbers, thymidine uptake and primary  
 34 production in the Římov Reservoir, August 23–24, 2017. Primary production was measured  
 35 between 6:00–10:00, 10:00–14:00 and 14:00–18:00.

36

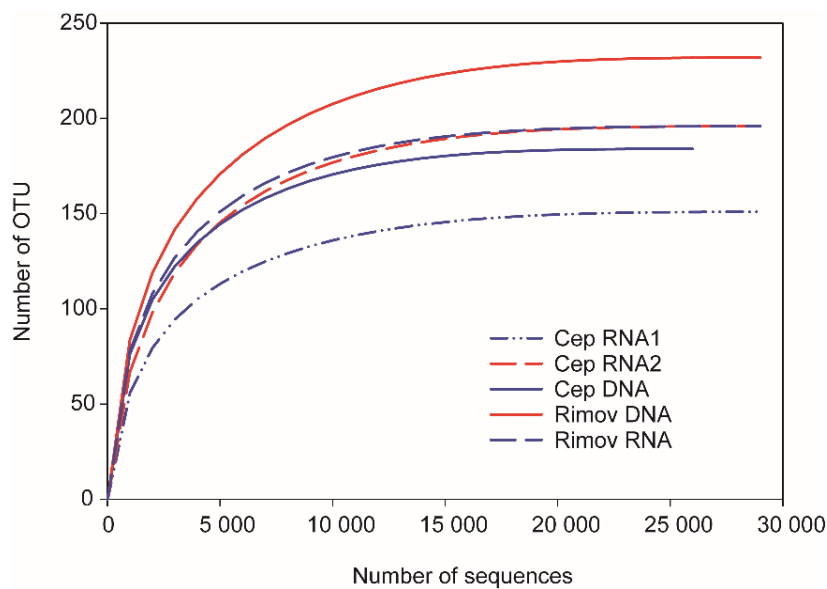

37

38 **Supplementary Figure S5.** Rarefaction curves at 94% OTU similarity. Cep DNA library  
 39 contains 26 000 sequences, all the other libraries were rarefied to 30 000 sequences, after which  
 40 singletons were excluded from the dataset.

41 **Additional references**

- 42 S1 Kirchman, D., Knees, E., Hodson, R. Leucine incorporation and its potential as a measure  
43 of protein-synthesis by bacteria in natural aquatic system. *Appl. Environ. Microbiol.* **49**,  
44 599–607 (1985).
- 45 S2 Straškrabová, V. *et al.* Investigations on pelagic food webs in mountain lakes - aims and  
46 methods. *J. Limnol.* **58**, 77-87(1999).
